# Supplementary material for: Intraprocedural 3D perfusion measurement during chemoembolisation with doxorubicin-eluting beads in liver metastases of malignant melanoma
Source: Springer Nature journal article supplement (doi:10.1007/s00330-017-5099-y), 2017-11-09
Supplement: MOESM1 [file 15208318]

**Supplementary material** Data set consisting of 152 individual measurements; the measurements per patient (varying between 1-3 measurement pairs) are highlighted in different shades of grey.

| **Patient** | **Measure-ment (number of measured metastases)** | **Cone-beam CT** | | | | **Multidetector CT** | | | |
| --- | --- | --- | --- | --- | --- | --- | --- | --- | --- |
| Lesion pre post | | Liver pre post | | Lesion pre post | | Liver pre post | |
| **1** | **1** | 38.05 | 0.42 | 2.01 | -0.53 | 10.56 | 1.99 | 1.81 | 3.62 |
| **2** | **2** | 15.58 | 0.32 | 1.48 | 0.74 | 6.26 | 5.34 | 3.17 | 18.84 |
| **3** | 22.37 | -0.85 | 3.07 | 2.33 | 7.29 | 1.21 | 2.03 | 1.73 |
| **3** | **4** | 13.36 | 5.09 | 0.64 | 0.11 | 3.12 | 0.16 | 2.22 | 1.01 |
| **5** | 11.02 | 1.27 | 3.5 | 1.17 | 5.51 | 0.19 | 1.37 | 3.92 |
| **6** | 14.42 | 1.06 | 1.06 | 0.32 | 0.42 | 0.01 | 2.06 | 3.82 |
| **v4** | **7** | 5.83 | 0.74 | 1.27 | 0.64 | 9.39 | 0.15 | 1.23 | 3.15 |
| **5** | **8** | 7.36 | 2.33 | 1.17 | 2.86 | 6.01 | 0.84 | 13.3 | 5.21 |
| **9** | 5.51 | 1.38 | 1.17 | 2.86 | 7.42 | 1.45 | 7.99 | 3.15 |
| **10** | 11.98 | 0.32 | 2.12 | 1.17 | 4.68 | 0.45 | 12.8 | 7.96 |
| **6** | **11** | 4.03 | 0.64 | 0.42 | 0.32 | 6.64 | 0.18 | 3.32 | 0.68 |
| **12** | 4.66 | 0.11 | -0.53 | 0.21 | 1.55 | 0.02 | 4.29 | 0.94 |
| **7** | **13** | 14.84 | -0.42 | 0.32 | 0.11 | 6.32 | 0.16 | 6.04 | 1.21 |
| **14** | 28.51 | -2.54 | 0.32 | 0.11 | 5.67 | 4.56 | 6.85 | 4.63 |
| **8** | **15** | 6.47 | 1.70 | 0.98 | 1.06 | 8.21 | 0.09 | 9.10 | 5.49 |
| **9** | **16** | 13.25 | -0.11 | 1.59 | -0.53 | 0.26 | 0.04 | 6.53 | 5.92 |
| **10** | **17** | 8.48 | 1.17 | 0.64 | 2.65 | 2.03 | 0.43 | 7.18 | 7.26 |
| **18** | 9.75 | 0.32 | 1.48 | 0.11 | 2.83 | 0.08 | 3.53 | 2.75 |
| **19** | 13.14 | 7.31 | 1.27 | 0.53 | 1.75 | 0.35 | 7.95 | 6.61 |
